# Supplementary material for: Molecular Specificity, Convergence and Constraint Shape Adaptive Evolution in Nutrient-Poor Environments
Source: PubMed Central journal article supplement (PMC3886903; doi:10.1371/journal.pgen.1004041), 2014-01-09

# Estimated density of the distribution of PCC

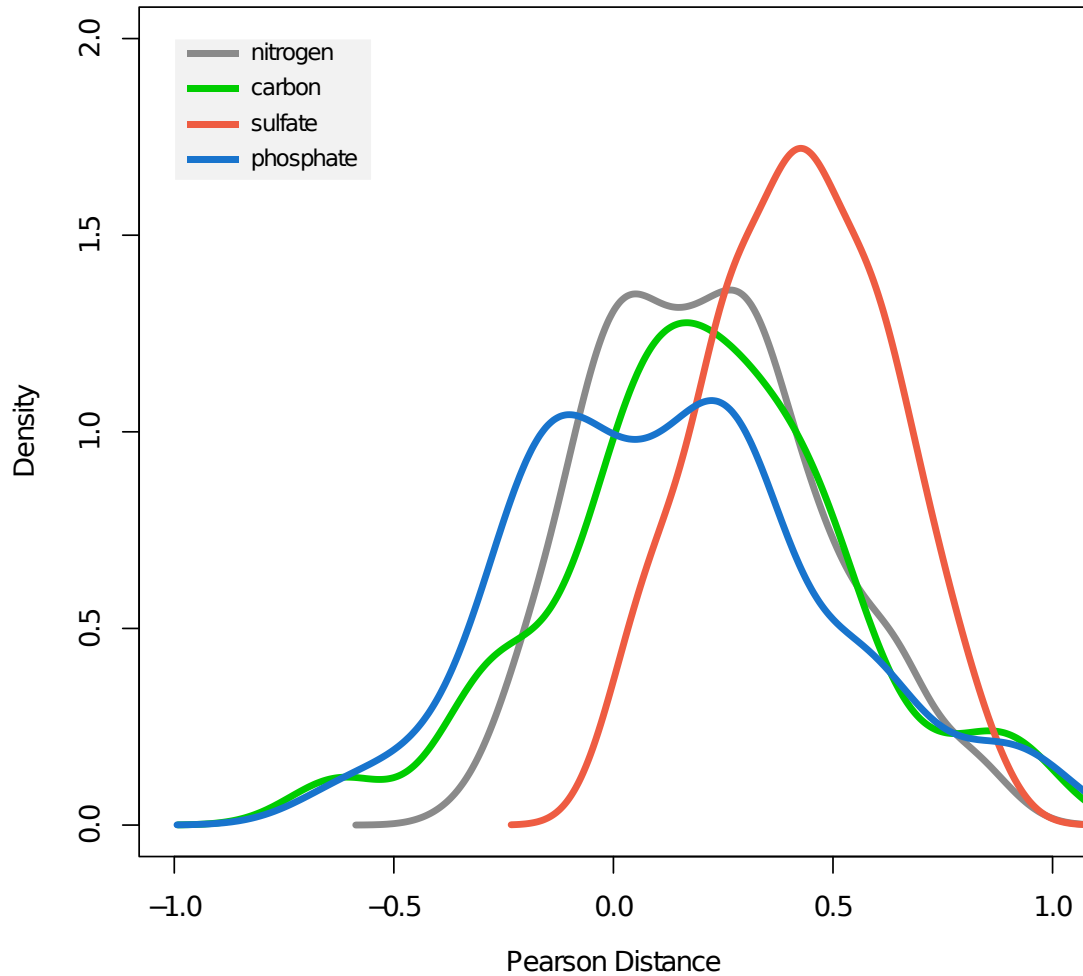

Supplement: pgen.1004041.s005.pdf [file pgen.1004041.s005.pdf]
