# Supplementary material for: Molecular Specificity, Convergence and Constraint Shape Adaptive Evolution in Nutrient-Poor Environments
Source: PubMed Central journal article supplement (PMC3886903; doi:10.1371/journal.pgen.1004041), 2014-01-09

A

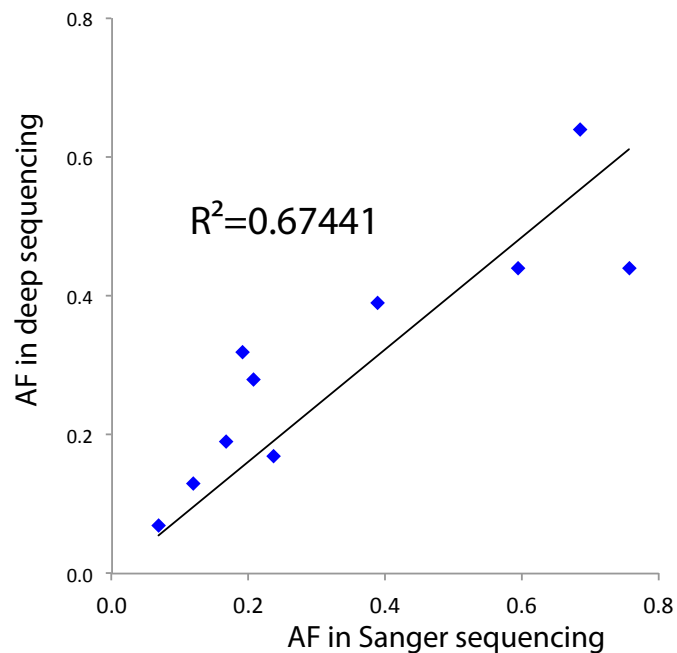

B

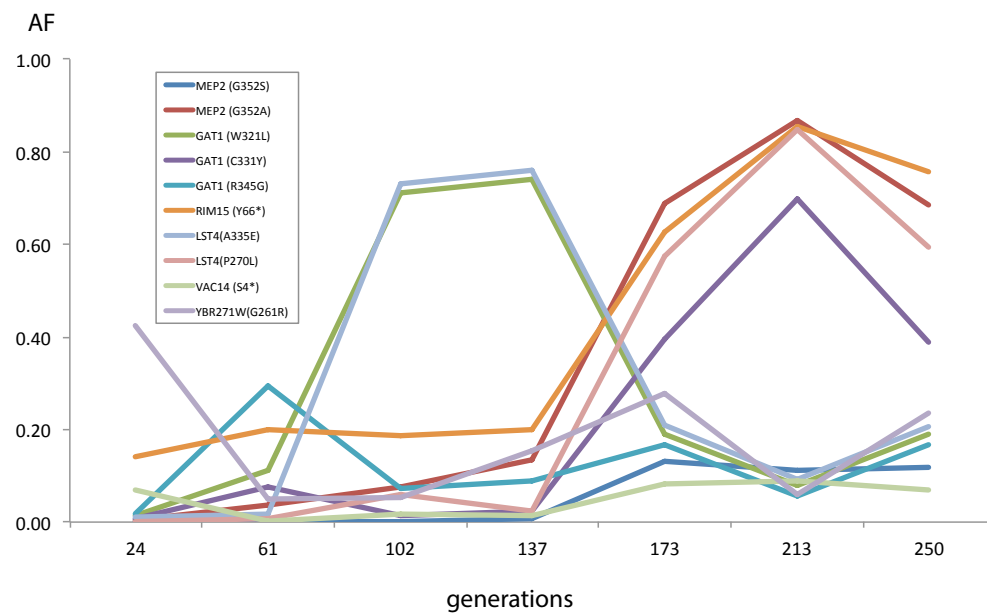

C

|                 | AF * | MEP2 (G352S) | GAT1 (W321L) | LST4 (A335E) | GAT1 (R345G) | YBR271W (G261R) | VAC14 (S4*) | MEP2 (G352A) | GAT1 (C331Y) | RIM15 (Y66*) | LST4 (P270L) |
|-----------------|------|--------------|--------------|--------------|--------------|-----------------|-------------|--------------|--------------|--------------|--------------|
| MEP2 (G352S)    | 0.13 | 1.00         | -0.38        | -0.31        | 0.75         | 0.71            | 0.96        | 0.97         | 0.88         | 0.95         | 0.94         |
| GAT1 (W321L)    | 0.32 |              | 1.00         | 0.99         | 0.08         | 0.07            | -0.29       | -0.35        | -0.47        | -0.40        | -0.40        |
| LST4 (A335E)    | 0.28 | Clone1       |              | 1.00         | 0.13         | 0.12            | -0.22       | -0.28        | -0.41        | -0.33        | -0.33        |
| GAT1 (R345G)    | 0.19 |              |              |              | 1.00         | 0.97            | 0.64        | 0.61         | 0.39         | 0.58         | 0.53         |
| YBR271W (G261R) | 0.17 |              |              |              |              | 1.00            | 0.57        | 0.56         | 0.33         | 0.51         | 0.46         |
| VAC14 (S4*)     | 0.07 |              |              |              |              |                 | 1.00        | 0.99         | 0.94         | 0.97         | 0.98         |
| MEP2 (G352A)    | 0.64 |              |              |              | Clone2       |                 |             | 1.00         | 0.96         | 0.99         | 0.99         |
| GAT1 (C331Y)    | 0.39 |              |              |              |              |                 |             |              | 1.00         | 0.97         | 0.98         |
| RIM15 (Y66*)    | 0.44 |              |              |              |              |                 |             |              |              | 1.00         | 0.99         |
| LST4 (P270L)    | 0.44 |              |              |              |              |                 |             | Clone3       |              |              | 1.00         |

D

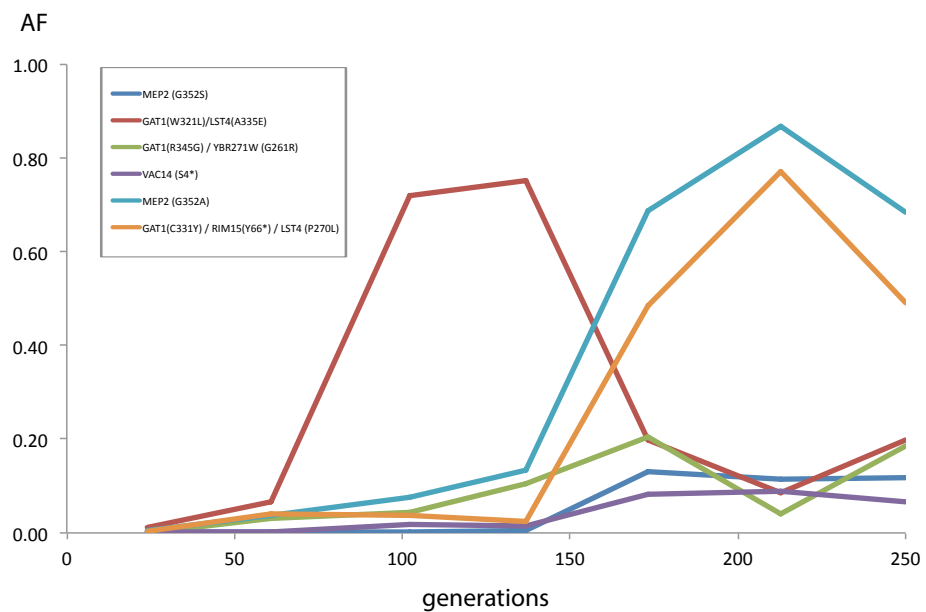

Supplement: pgen.1004041.s011.pdf [file pgen.1004041.s011.pdf]
