# Supplementary material for: Molecular Specificity, Convergence and Constraint Shape Adaptive Evolution in Nutrient-Poor Environments
Source: PubMed Central journal article supplement (PMC3886903; doi:10.1371/journal.pgen.1004041), 2014-01-09
Supplement: pgen.1004041.s015.pdf [file pgen.1004041.s015.pdf]

| Nitrogen source | sample     | sequencing type | average RD |
|-----------------|------------|-----------------|------------|
| Ammonium        | C1         | 100x100         | 316.8      |
| Ammonium        | C2         | 100x100         | 339.9      |
| Ammonium        | C3         | 100x100         | 271.7      |
| Ammonium        | population | 100x100         | 316.6      |
| Arginine        | C1         | 100x100         | 99.9       |
| Arginine        | C2         | 100x100         | 134.1      |
| Arginine        | C3         | 100x100         | 142.7      |
| Arginine        | population | 100x100         | 159.0      |
| Glutamine       | C1         | 100x100         | 259.6      |
| Glutamine       | C2         | 100x100         | 616.4      |
| Glutamine       | C3         | 100x100         | 443.5      |
| Glutamine       | population | 77              | 31.1       |
| Proline         | C1         | 36              | 20.5       |
| Proline         | C2         | 100x100         | 144.7      |
| Proline         | population | 100x100         | 347.0      |

| Nitrogen source   | sample     | sequencing type | average RD |
|-------------------|------------|-----------------|------------|
| Glutamate         | C1         | 50x50           | 14.9       |
| Glutamate         | population | 77              | 47.6       |
| Urea              | C1         | 50x50           | 38.6       |
| Urea              | C2         | 50x50           | 38.3       |
| Urea              | C3         | 50x50           | 53.7       |
| Urea              | population | 100x100         | 126.0      |
| Allantoin         | C1         | 36              | 11.7       |
| Allantoin         | C2         | 50x50           | 53.8       |
| Allantoin         | C3         | 50x50           | 34.0       |
| Allantoin         | population | 100x100         | 233.2      |
| Gln/Alla          | population | 77              | 45.5       |
| Gln/Pro/Alla/Urea | population | 77              | 45.3       |
| Gln/Pro/Alla      | population | 77              | 53.1       |
| Gln/Pro           | population | 77              | 45.4       |
| -                 | FY4        | 100x100         | 254.4      |
