# Supplementary material for: Molecular Specificity, Convergence and Constraint Shape Adaptive Evolution in Nutrient-Poor Environments
Source: PubMed Central journal article supplement (PMC3886903; doi:10.1371/journal.pgen.1004041), 2014-01-09
Supplement: pgen.1004041.s016.pdf [file pgen.1004041.s016.pdf]

List of primers used for allele specific PCR for clone 3 recovered from the ammonium-limited population

| chromosome | position | WT:MT allele | gene         | Common Forward primer | Wild-type reverse primer | Mutant type reverse primer |
|------------|----------|--------------|--------------|-----------------------|--------------------------|----------------------------|
| chr06      | 190932   | T:G          | <i>FAB1</i>  | AAAAACAGCCACACACTGAGA | AGCTTACCTGTTGTTCGA       | AGCTTACCTGTTGTTCGC         |
| chr06      | 96957    | G:A          | <i>GAT1</i>  | TCCTCCTTCGATGACCACTT  | GAAGAGGCCGCAAGCATTGC     | GAAGAGGCCGCAAGCATTGT       |
| chr11      | 117178   | G:A          | <i>LST4</i>  | TGCCATTAGGAGAGGAAGGA  | TATTGACATCAGGACGCATTATCC | TATTGACATCAGGACGCATTATCT   |
| chr14      | 358507   | G:C          | <i>MEP2</i>  | GTTTCGTGCCAATCTGGTC   | AGTTAATACAGAACCAATACAAC  | AGTTAATACAGAACCAATACAAG    |
| chr06      | 74230    | A:C          | <i>RIM15</i> | CTGGCCACAGAGAAGAATCC  | GTTCCACTGTGGAGAGCCA      | CTGGCCACAGAGAAGAATCC       |
