# Supplementary material for: NONDESTRUCTIVE TESTING OF PERCUSSIVE ARC WELDS.
Source: PLOS journal article supplement (doi:10.1371/journal.pgen.1004041), 1967-01-01

**A**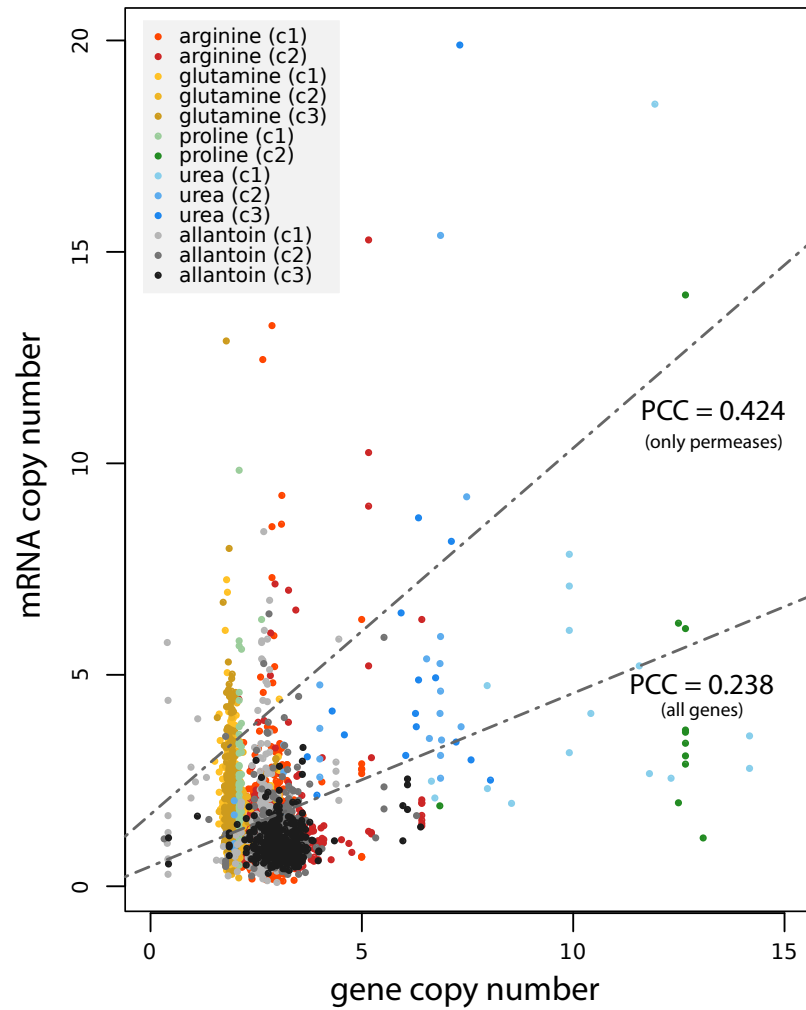**B**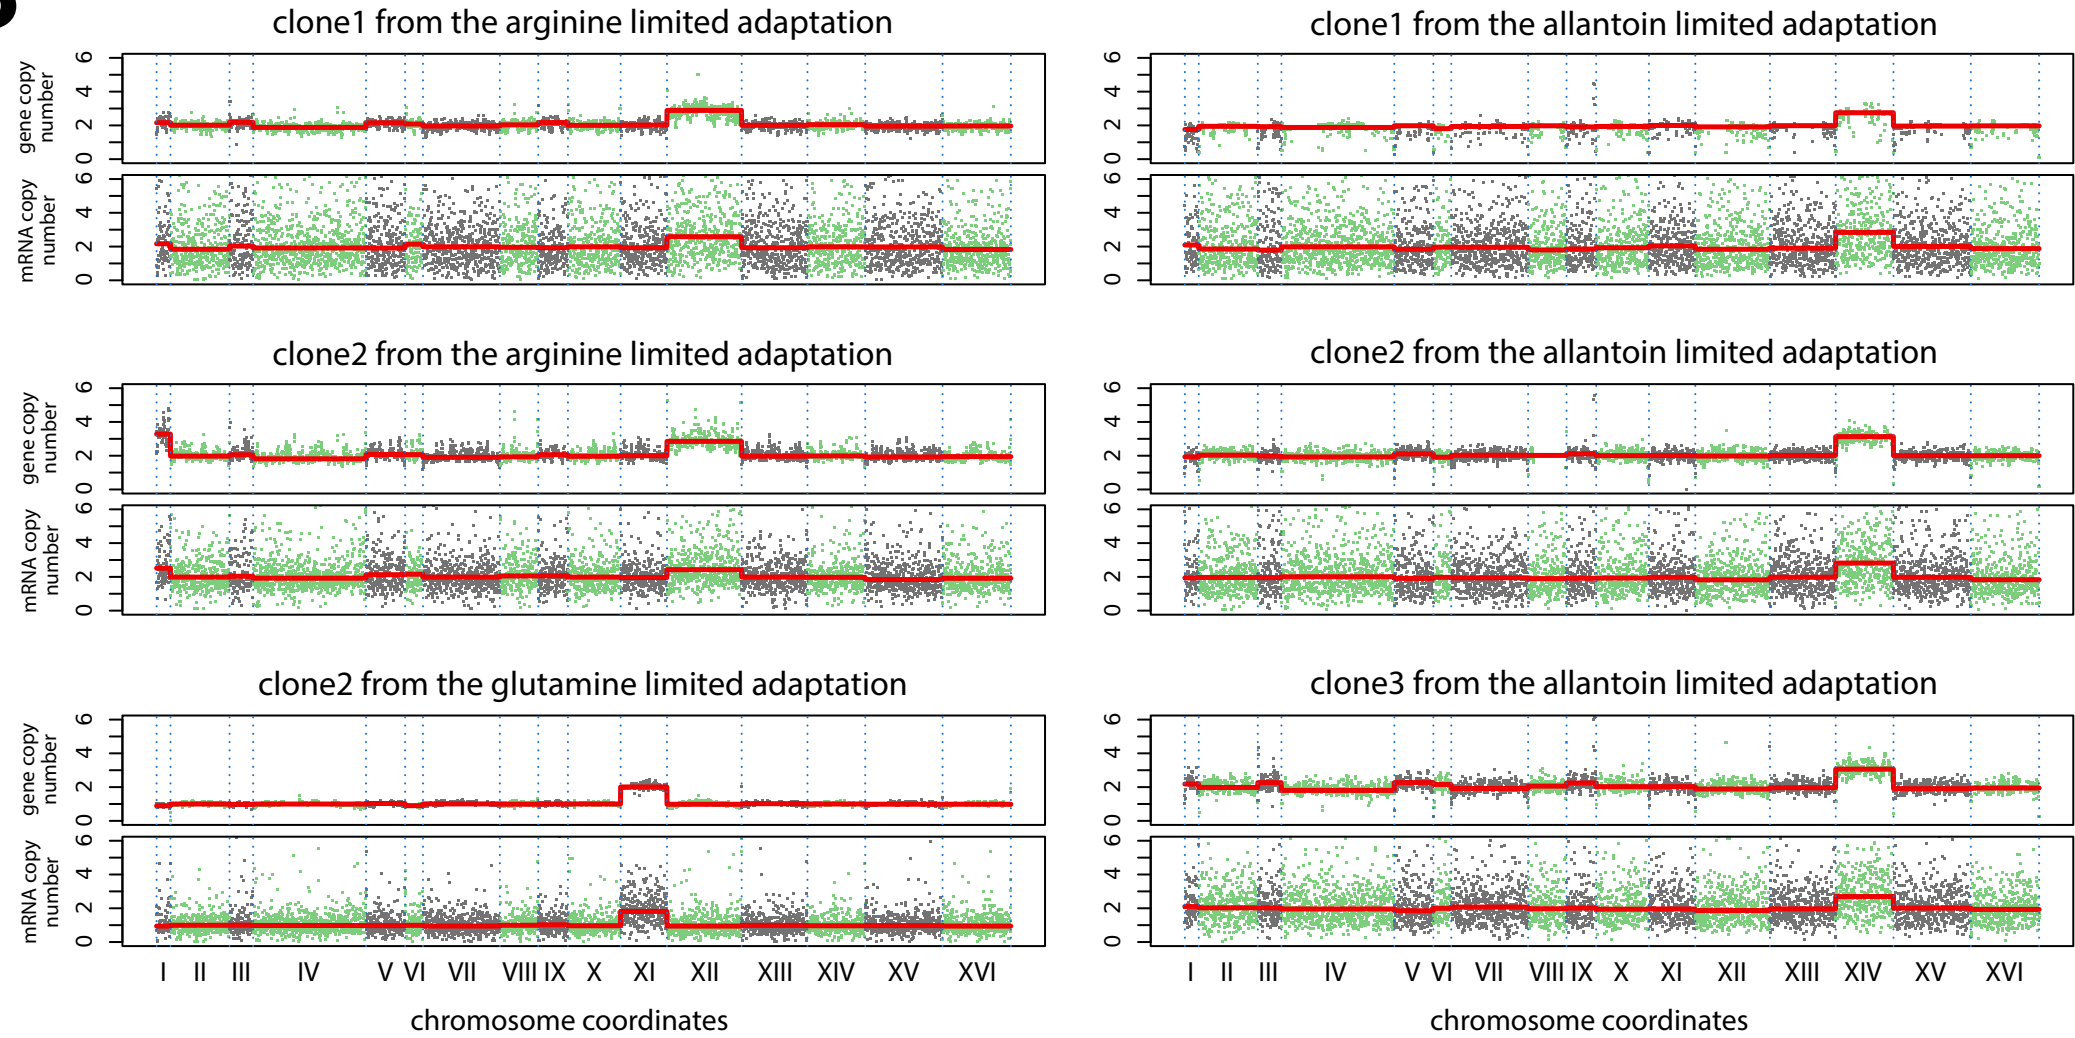

Supplement: S6 (10.1371/journal.pgen.1004041.s006) [file journal.pgen.1004041.s006]
